# Supplementary material
Source: PubMed Central journal article supplement (PMC8545803)
Supplement: mmc2.pdf [file mmc2.pdf]

# THE LANCET

## Digital Health

### Supplementary appendix

This appendix formed part of the original submission and has been peer reviewed. We post it as supplied by the authors.

Supplement to: Kephart JL, Delclòs-Alió X, Rodríguez DA, et al. The effect of population mobility on COVID-19 incidence in 314 Latin American cities: a longitudinal ecological study with mobile phone location data. *Lancet Digit Health* 2021; published online Aug 26. [https://doi.org/10.1016/S2589-7500\(21\)00174-6](https://doi.org/10.1016/S2589-7500(21)00174-6).

**Table S1.** Sub-city area characteristics among 1,031 sub-city areas in 314 Latin American cities overall and stratified by country

|                                                       | <b>Total</b>         | <b>Argentina</b>     | <b>Brazil</b>       | <b>Colombia</b>      | <b>Guatemala</b>     | <b>Mexico</b>        |
|-------------------------------------------------------|----------------------|----------------------|---------------------|----------------------|----------------------|----------------------|
| Sub-city areas (n)                                    | 1,031                | 107                  | 416                 | 82                   | 20                   | 406                  |
| Cities represented by sub-city areas (n)              | 314                  | 33                   | 151                 | 35                   | 3                    | 92                   |
| Cumulative COVID-19 cases per 100k inh. <sup>a</sup>  | 855 [401, 1,655]     | 959 [162, 1775]      | 1,625 [1078, 2309]  | 1,000 [574, 1474]    | 848 [553, 1167]      | 400 [253, 600]       |
| Change in mobility (ratio) <sup>a, c</sup>            | 0.80 [0.67, 0.99]    | 0.58 [0.48, 0.70]    | 0.97 [0.82, 1.18]   | 0.71 [0.62, 0.76]    | 0.86 [0.67, 1.22]    | 0.75 [0.66, 0.85]    |
| Population (thousands) <sup>a</sup>                   | 130.8 [44.2, 277.0]  | 209.7 [133.4, 350.7] | 138.0 [61.1, 273.2] | 143.0 [80.0, 310.8]  | 109.3 [44.1, 171.3]  | 82.5 [25.5, 237.72]  |
| Pop. density (pop. in thousands / sq.km) <sup>a</sup> | 8.2 [5.5, 14.0]      | 8.1 [5.3, 11.8]      | 6.6 [4.7, 10.6]     | 16.7 [11.6, 24.0]    | 14.6 [10.4, 18.0]    | 8.7 [6.2, 13.4]      |
| Residential overcrowding (%) <sup>a, d</sup>          | 5.3 [2.8, 10.9]      | 3.8 [2.4, 5.2]       | 2.7 [1.7, 4.1]      | 5.1 [3.3, 7.3]       | 22.2 [16.6, 27.5]    | 11.2 [8.1, 14.9]     |
| Population educational attainment <sup>a, e</sup>     | -0.84 [-1.60, -0.02] | -0.59 [-1.34, 0.02]  | -0.61 [-1.35, 0.07] | -0.69 [-1.25, -0.02] | -2.08 [-2.68, -0.77] | -1.19 [-1.98, -0.16] |

<sup>a</sup> Values correspond to medians [Q1, Q3].

<sup>c</sup> Ratio of overall vs baseline mobility (March 2<sup>nd</sup>-9<sup>th</sup>, 2020).

<sup>d</sup> Proportion of households with more than 3 people per room.

<sup>e</sup> Index that includes an average of the z-scores of the % population in the sub-city area aged 25 or above that has completed secondary education or above, and the % population aged 25 or above that has completed university education or above.

**Figure S1.** Incidence rate ratios (IRR) and 95% confidence intervals of the adjusted association between lagged mobility change and COVID-19 incidence at the sub-city level stratified by country, comparing mobility from one to six weeks prior to COVID-19 incidence.<sup>a</sup>

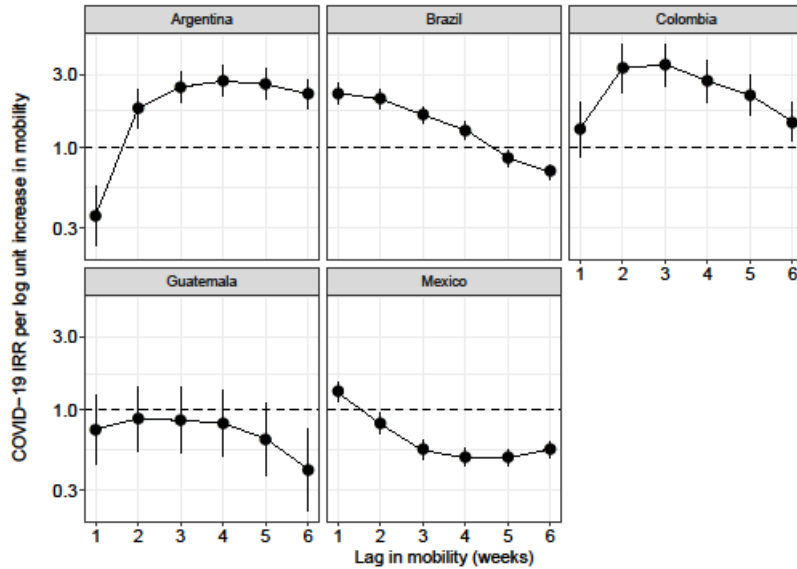

<sup>a</sup> Results come from adjusted models that include sub-city area weekly COVID-19 incidence (outcome), mobility (primary exposure), weeks since 2<sup>nd</sup> case, population density, residential overcrowding, educational attainment, and country for 1,031 sub-city areas in Latin America. Weekly mobility was lagged from one to six weeks prior to weekly COVID-19 incidence in subsequent models.
